# Supplementary material for: A comparative study of Zr, Al or Sr doped Mn/MCM-41 for NH3-SCR and resistance to SO2/H2O
Source: Royal Society of Chemistry journal article supplement (doi:10.1039/d2nj02637f), 2022-01-01
Supplement: d2nj02637f1.pdf [file d2nj02637f1.pdf]

## 1. Temperature-programmed technology

Temperature-programmed reduction of H<sub>2</sub> (H<sub>2</sub>-TPR) and temperature-programmed desorption of NH<sub>3</sub> or NO (NH<sub>3</sub>-TPD; NO-TPD) was conducted on the TP-5076 analyzer (Xianquan, China) with a thermal conductivity detector (TCD). For H<sub>2</sub>-TPR, about 50 mg sample was pretreated at 300 °C in a highly pure He (20 mL/min) for 60 min and then cooled to 50 °C. After that, the gas was switched to a 5% H<sub>2</sub>/He mixture (30 mL/min), and when the baseline was stable, the sample was heated from room temperature to 700 °C with the heating rate of 10 °C/min. The consumption of H<sub>2</sub> was detected online by TCD. For NH<sub>3</sub>-TPD or NO-TPD, about 100 mg sample was pretreated in highly pure He (10 mL/min) for 60 min at 300 °C and then cooled to 50 °C. Subsequently, the sample was exposed to a mixture of 1% NH<sub>3</sub>/N<sub>2</sub> or 1% NO/N<sub>2</sub> (10 mL/min) for 60 min and then purged in highly pure He (10 mL/min) to remove weakly adsorbed NH<sub>3</sub> or NO. Finally, after the baseline was stable, the sample was heated from 50 to 500 °C. The heating rate was 10 °C/min. The amount of NH<sub>3</sub> or NO desorbed was on-line detected by TCD.

## 2. *In-situ* DRIFT

The experiments of *in-situ* DRIFT were conducted on a Thermo Scientific Nicolet iS50 FTIR spectrometer (Thermo Nicolet Corporation, USA) with a MCT detector. Before the testing, the samples were put into infrared reaction pool, pretreated by a highly pure N<sub>2</sub> at 300 °C for 60 min and then cooled to 50 °C. For NH<sub>3</sub> (or NO+O<sub>2</sub>) adsorption, the gas was switched to NH<sub>3</sub> (or NO+O<sub>2</sub>) for 60 min and then purged by a highly pure N<sub>2</sub> stream. The spectra were recorded at target temperatures. For the

transient studies, after the pretreated sample in a highly pure  $N_2$  at 300 °C for 60 min was cooled to 200 °C, the catalysts were exposed to  $NH_3$  for 60 min at 200 °C and then a highly pure  $N_2$  gas was switched to purge for 30 min. After that,  $NO+O_2$  were introduced in the reaction pool. All spectra were collected after reaching the desired conditions. During the DRIFT testing, the reaction conditions were as following: 1000 ppm  $NH_3$  or 1000 ppm  $NO +5\% O_2$ , and  $N_2$  as balance, with a total flow rate of 200 mL/min. The heating rate was 10 °C/min.

For the influence of  $SO_2$  on  $NH_3$ -SCR reaction, the samples were put into the reaction pool and pretreated by a highly pure  $N_2$  with a flow rate of 150 mL/min in 300 °C for 60 min and then cooled to 200 °C. For  $SO_2$  adsorption, 1000 ppm  $SO_2$  with a flow rate of 50 mL/min and 5%  $O_2$  with a flow rate of 10 mL/min was added into the reaction pool. After 180 min, the  $SO_2$  and  $O_2$  were shut off. For the transient studies, after the catalysts were pre-exposed to 1000 ppm  $SO_2+5\% O_2$  for 120 min at 200 °C and then shut off, a highly pure  $N_2$  was switched to purge for 30 min. After that, 1000 ppm  $NH_3$ , 1000 ppm  $NO$  and 5%  $O_2$  were simultaneously introduced into the reaction pool.  $N_2$  was as balance, and the total flow rate of gas was 200 mL/min. All spectra were recorded to describe the relationship between the peak intensity and time.

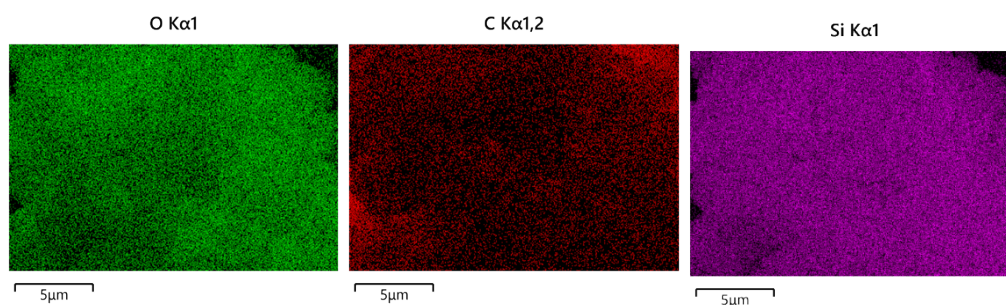

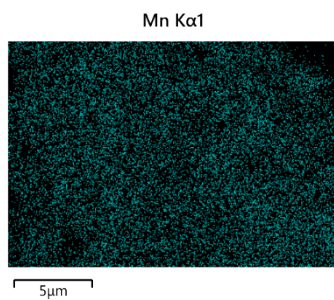

Fig. S1 EDS element mappings of Mn-MCM-41

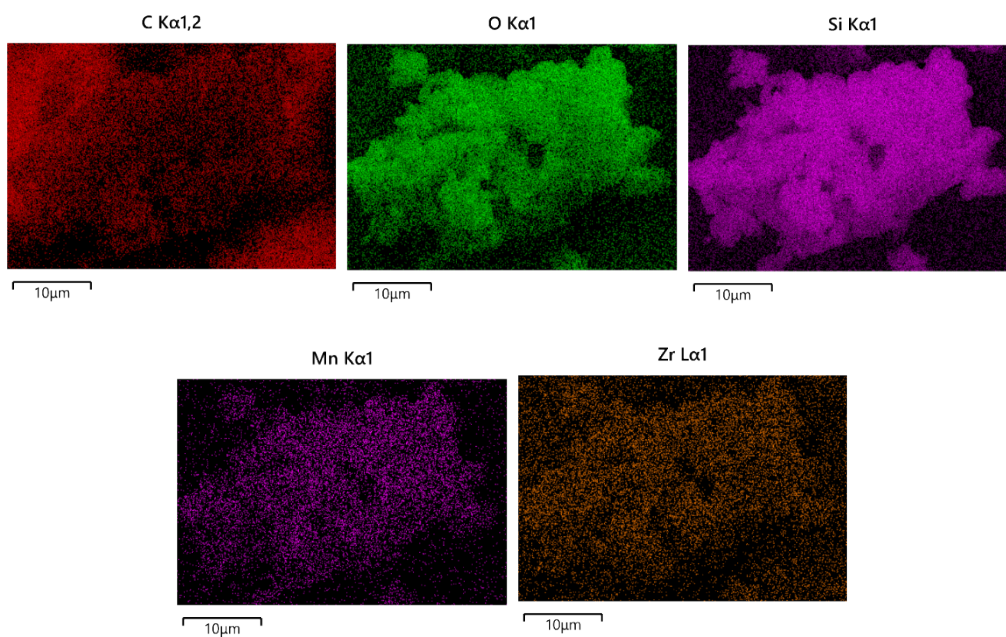

Fig. S2 EDS element mappings of Mn/Zr-MCM-41

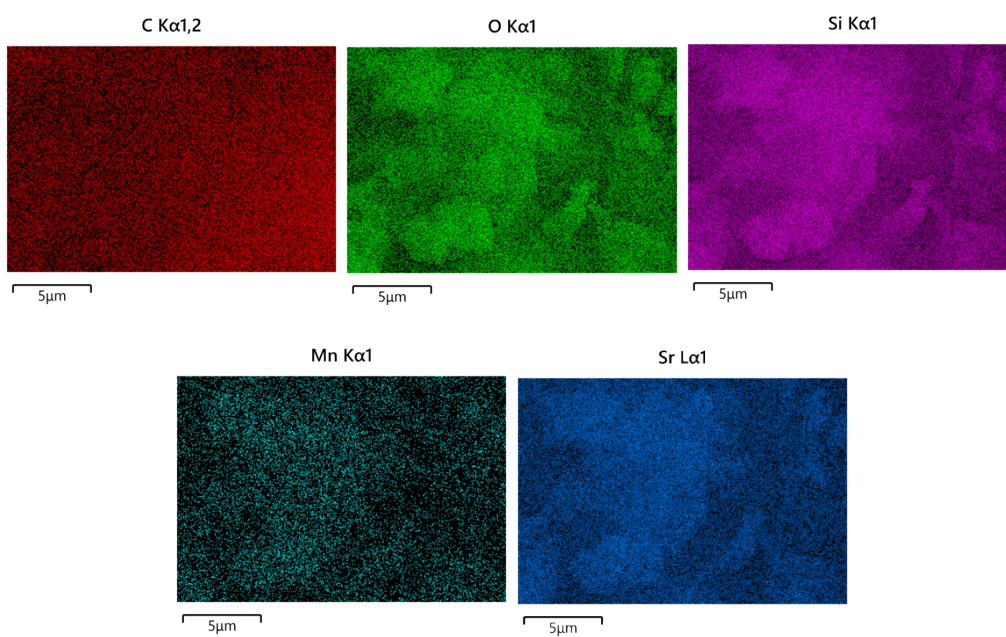

Fig. S3 EDS element mappings of Mn/Sr-MCM-41

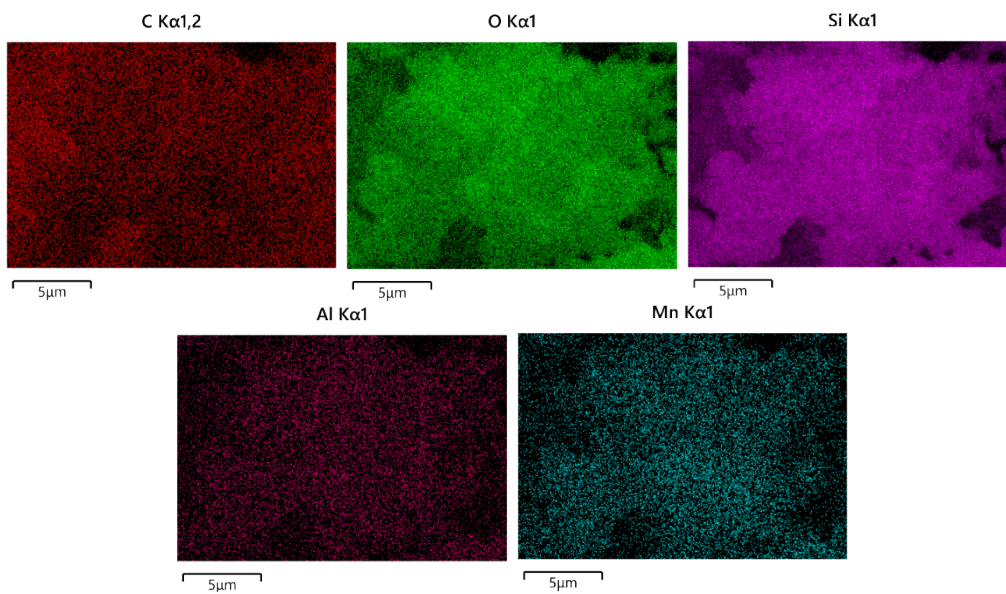

Fig. S4 EDS element mappings of Mn/Al-MCM-41
